# Supplementary material for: Transposable element landscapes in aging Drosophila
Source: PubMed Central journal article supplement (PMC8893327; doi:10.1371/journal.pgen.1010024), 2022-03-03

**A**

*ISO1* - Whole flies

*ISO1* - Brains

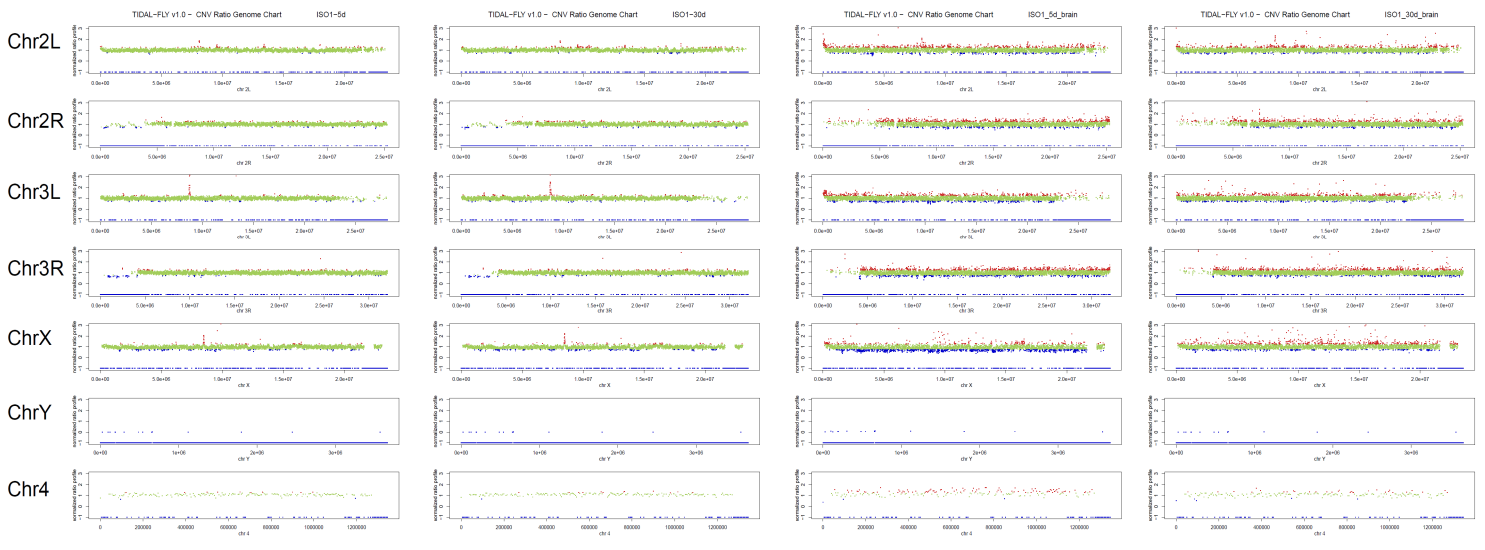

*OreR* - Whole flies

*OreR* - Brains

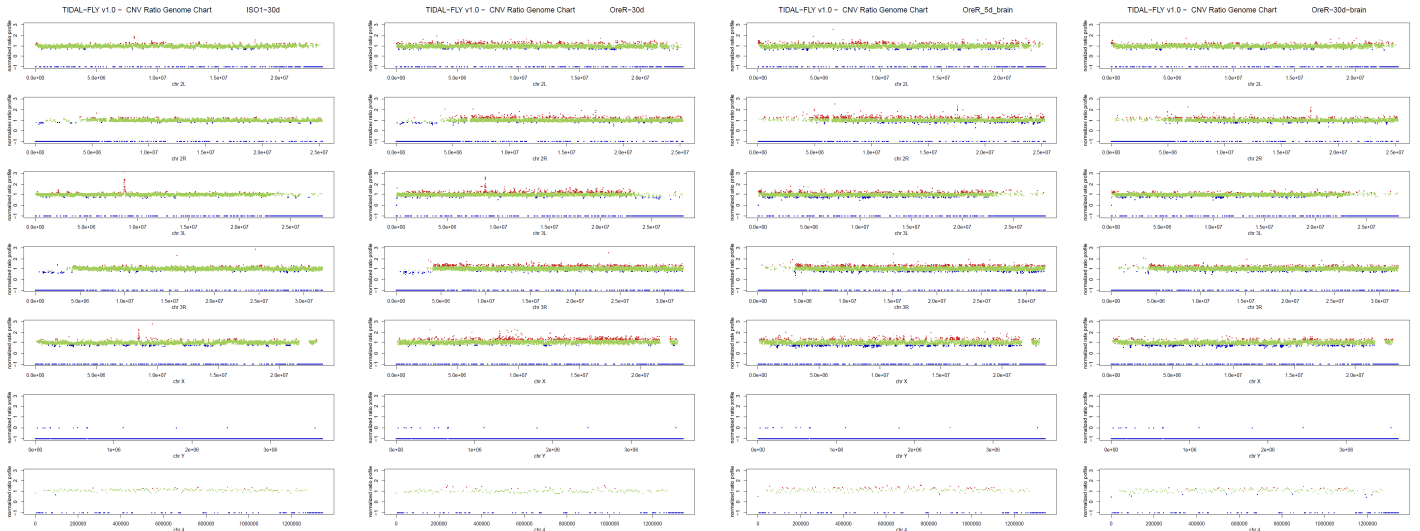

*w1118* - Whole flies

*w1118* - Brains

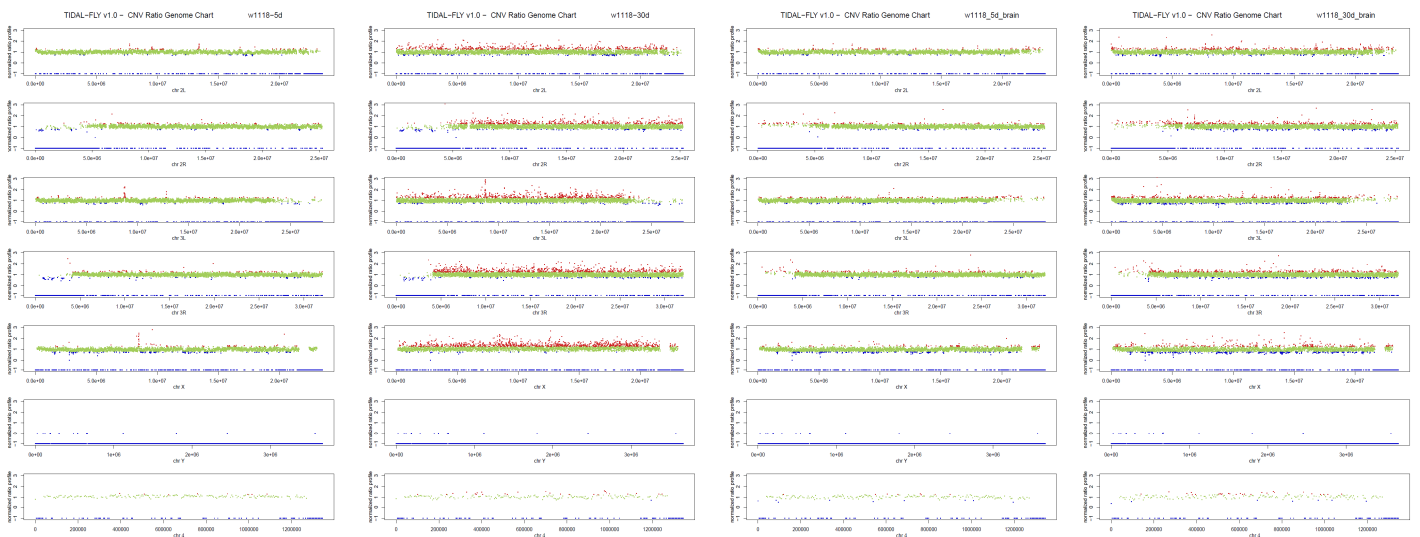

**B**

*Aub\_g1* -Whole flies

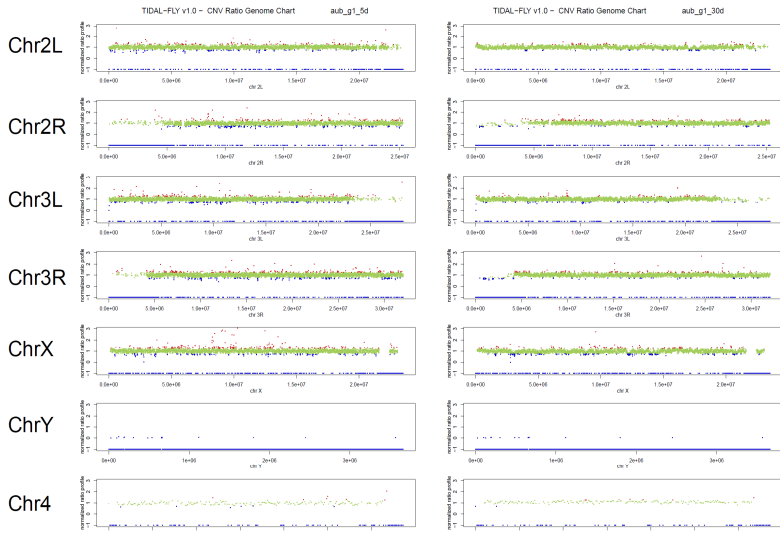

*Aub\_g2* -Whole flies

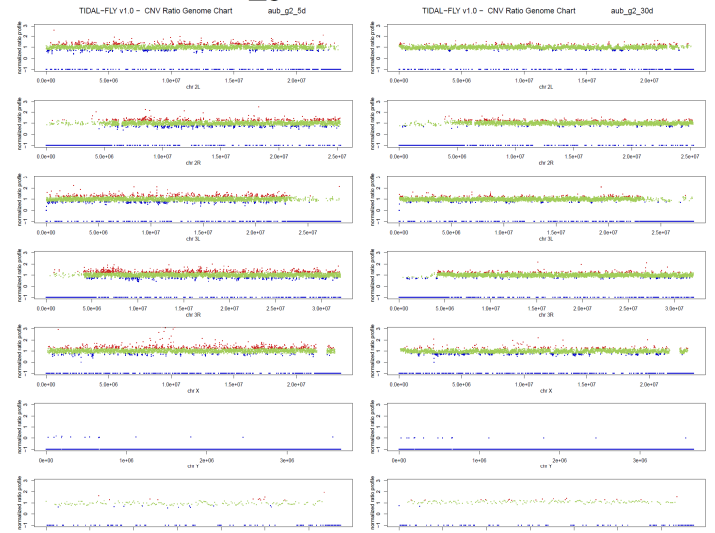

*Ago3\_g1* -Whole flies

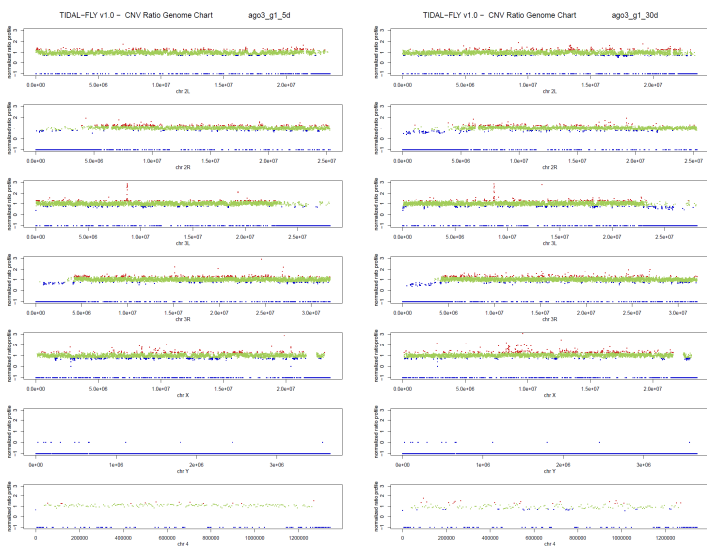

*Ago3\_g2* -Whole flies

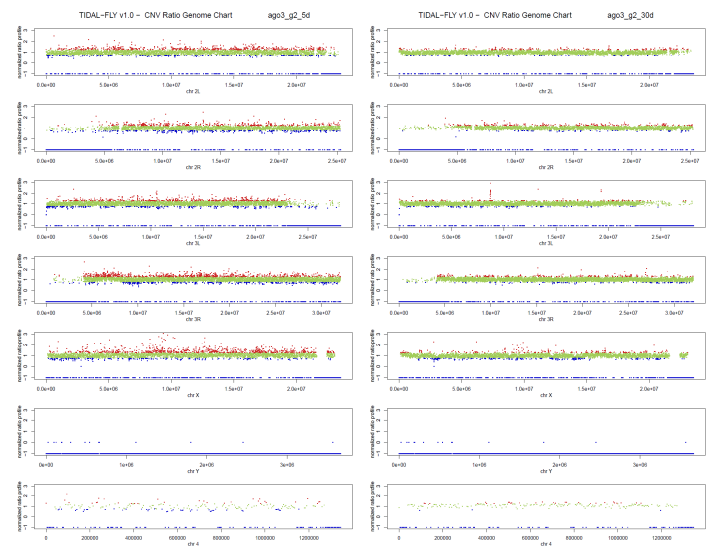

**C**

*PIWI\_g1* -Whole flies

*PIWI\_g1* -Brains

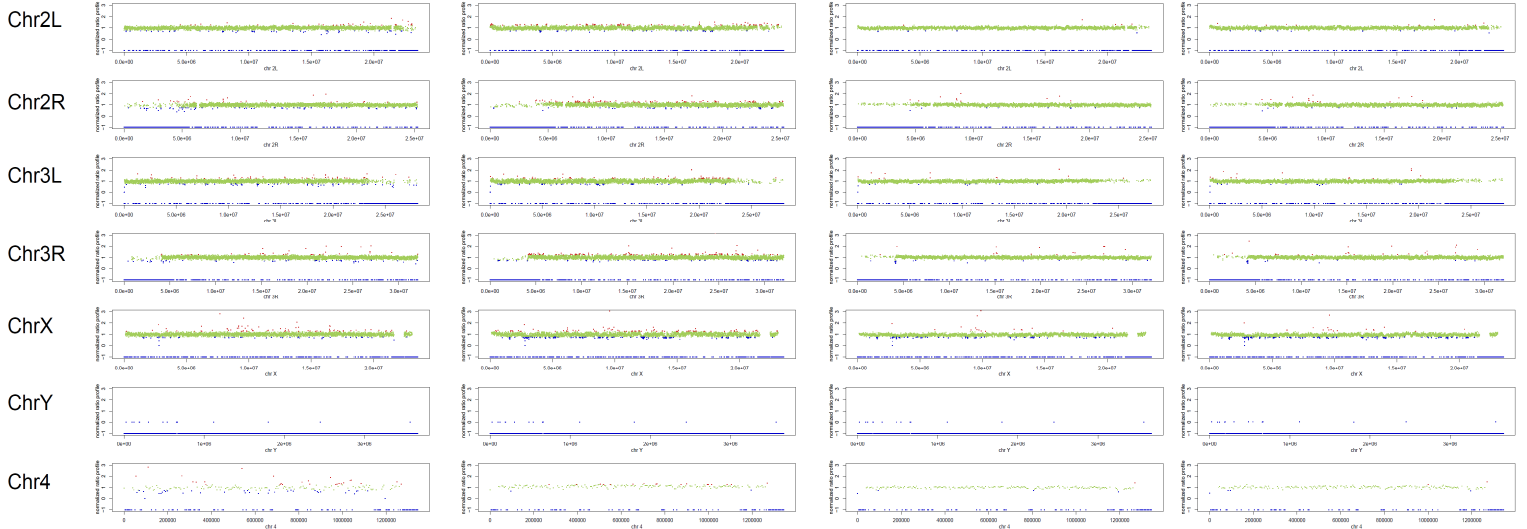

*PIWI[HDR-4xP3-mcherry]* -Whole flies

*PIWI[HDR-4xP3-mcherry]* -Brains

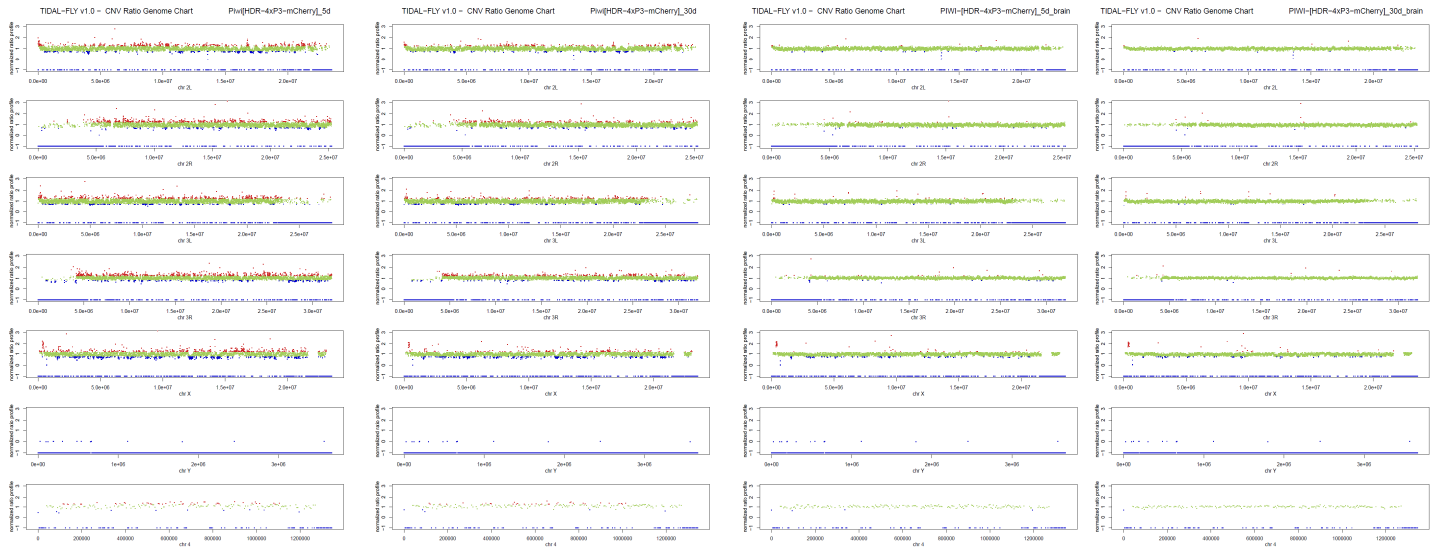

**D**

*Ago2\_2-5-14* -Whole flies

*Ago2\_2-5-14* -Brains

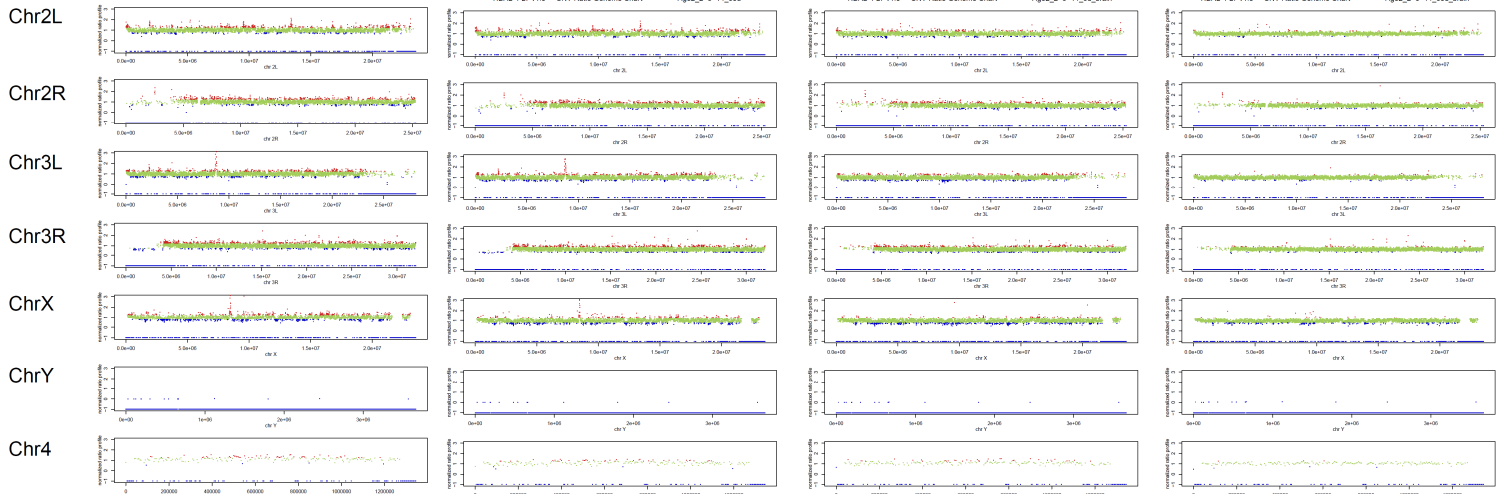

*Ago2\_2-16-4* -Whole flies

*Ago2\_2-16-4* -Brains

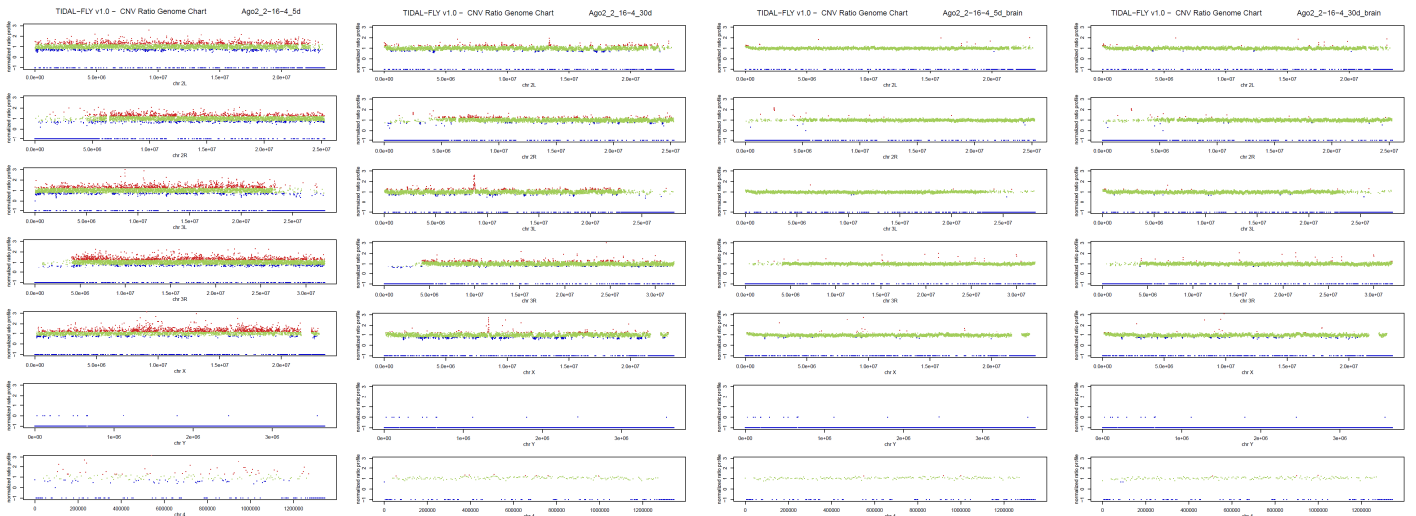

WT-*Ago2\_Rescue\_Ago2-2-5-14* -Whole flies

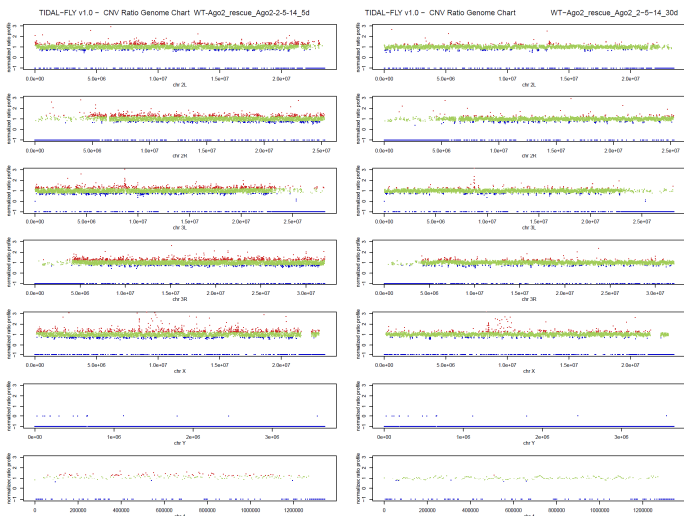

**E**

*Dcr2\_L811fsx* -Whole flies

*Dcr2\_L811fsx* -Brains

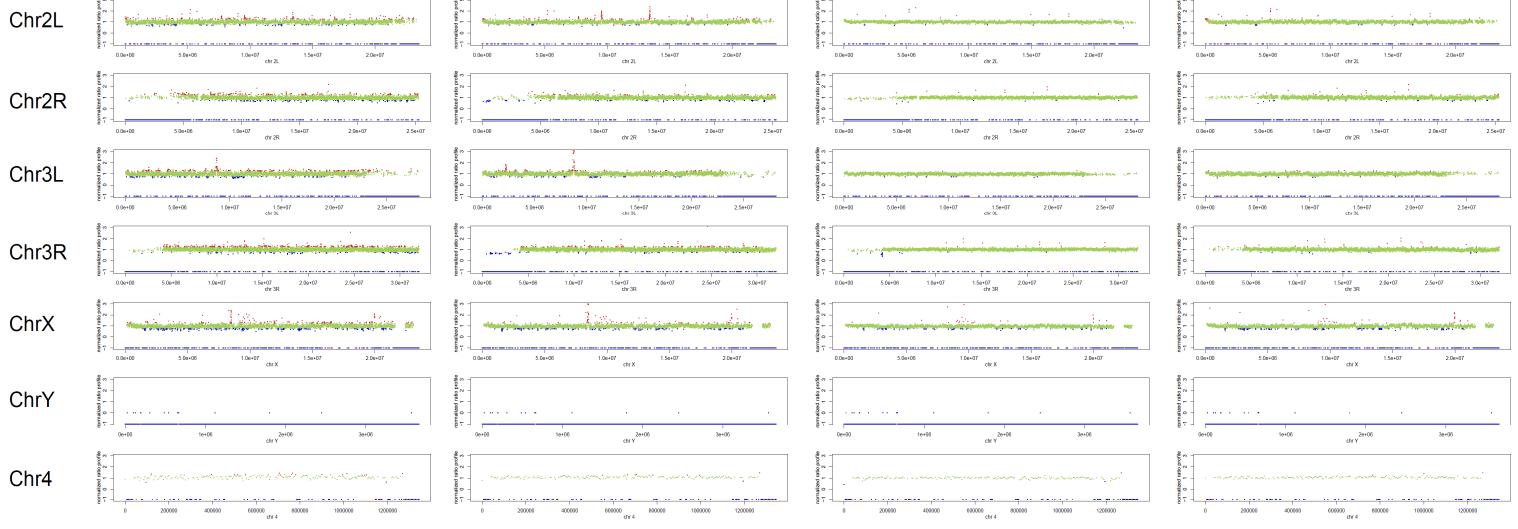

*Dcr2\_R416X* -Whole flies

*Dcr2\_R416X* -Brains

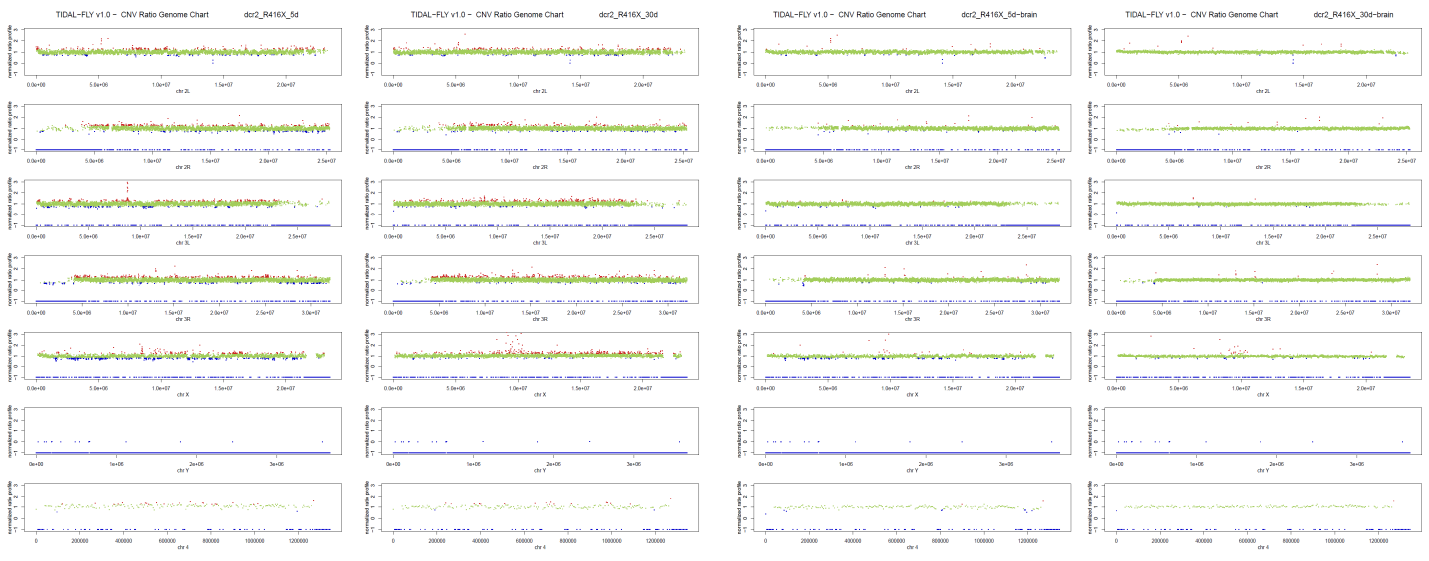

Supplement: pgen.1010024.s003.pdf [file pgen.1010024.s003.pdf]
