# Supplementary material for: Transposable element landscapes in aging Drosophila
Source: PubMed Central journal article supplement (PMC8893327; doi:10.1371/journal.pgen.1010024), 2022-03-03
Supplement: pgen.1010024.s001.pdf [file pgen.1010024.s001.pdf]

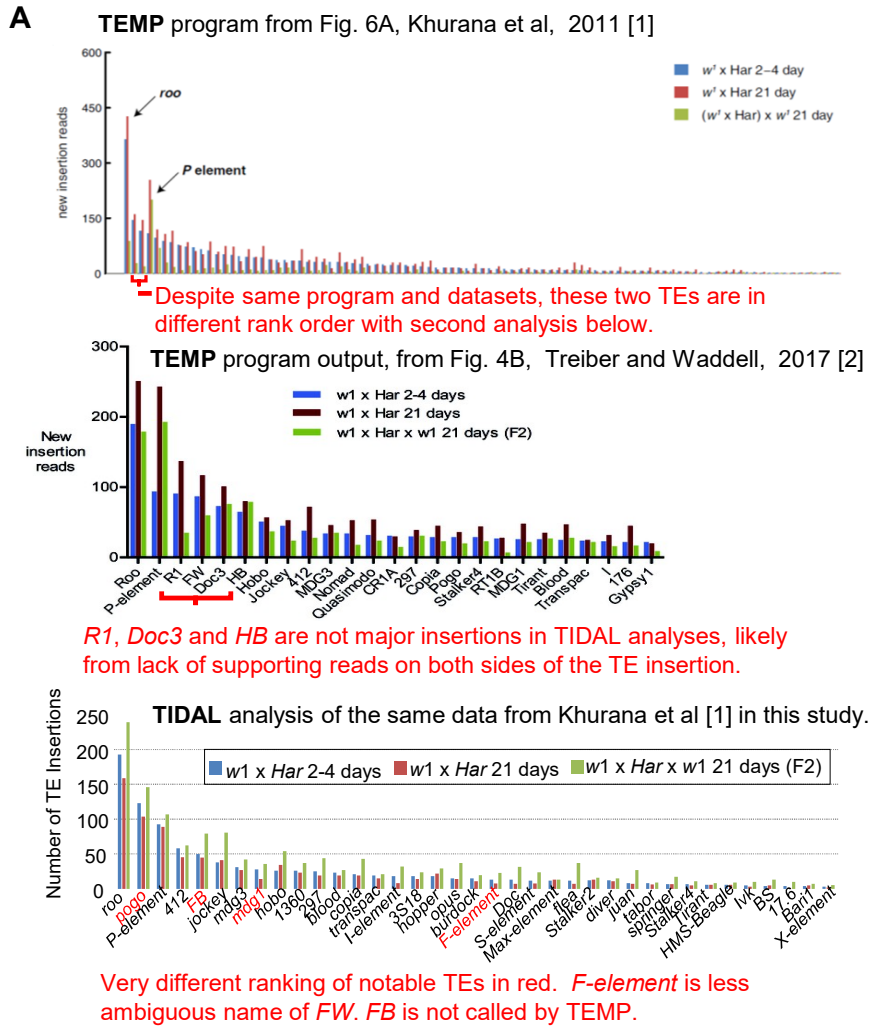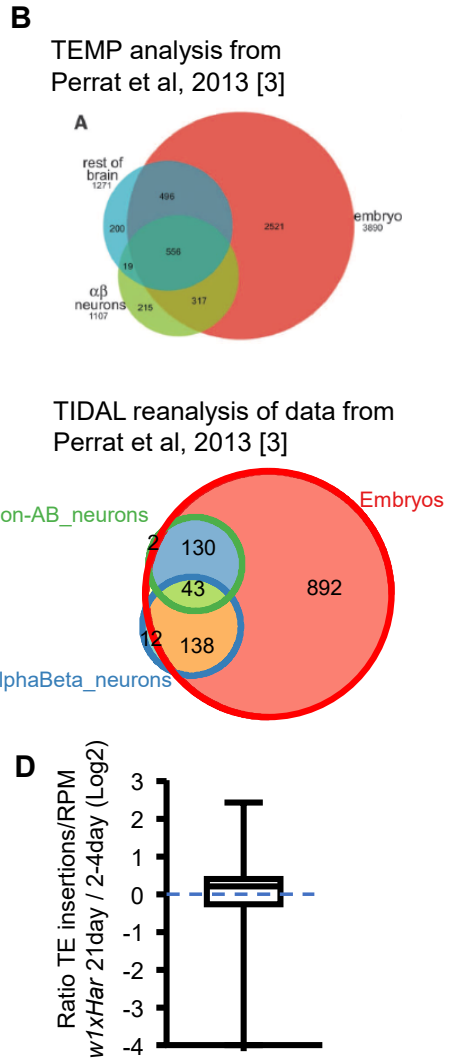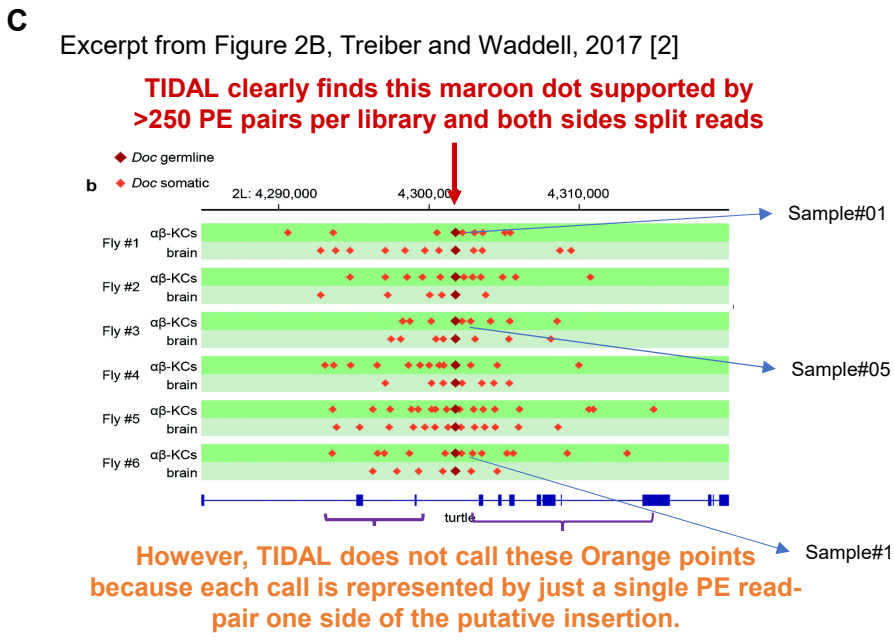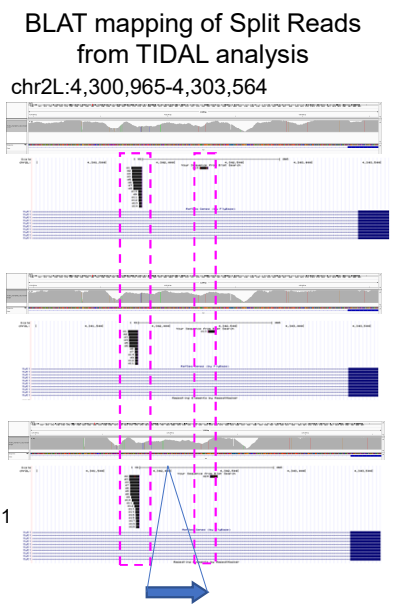

1. Khurana JS, Wang J, Xu J, Koppetsch BS, Thomson TC, Nowosielska A, Li C, Zamore PD, Weng Z, Theurkauf WE. 2011. Adaptation to P element transposon invasion in *Drosophila melanogaster*. *Cell* **147**: 1551-1563.  
 2. Treiber CD, Waddell S. 2017. Resolving the prevalence of somatic transposition in *Drosophila*. *eLife* **6**.  
 3. Perrat PN, DasGupta S, Wang J, Theurkauf W, Weng Z, Rosbash M, Waddell S. 2013. Transposition-driven genomic heterogeneity in the *Drosophila* brain. *Science* **340**: 91-95.
