# Supplementary material for: Transposable element landscapes in aging Drosophila
Source: PubMed Central journal article supplement (PMC8893327; doi:10.1371/journal.pgen.1010024), 2022-03-03

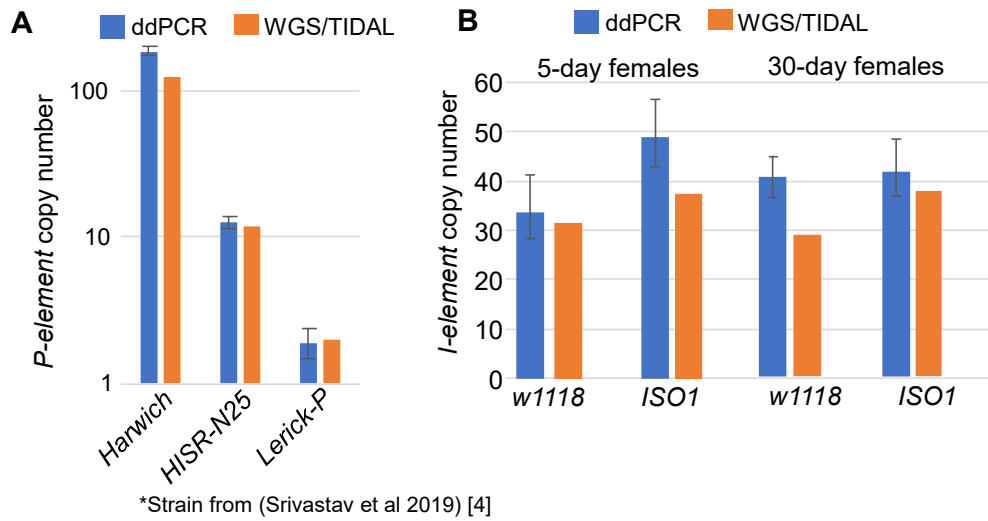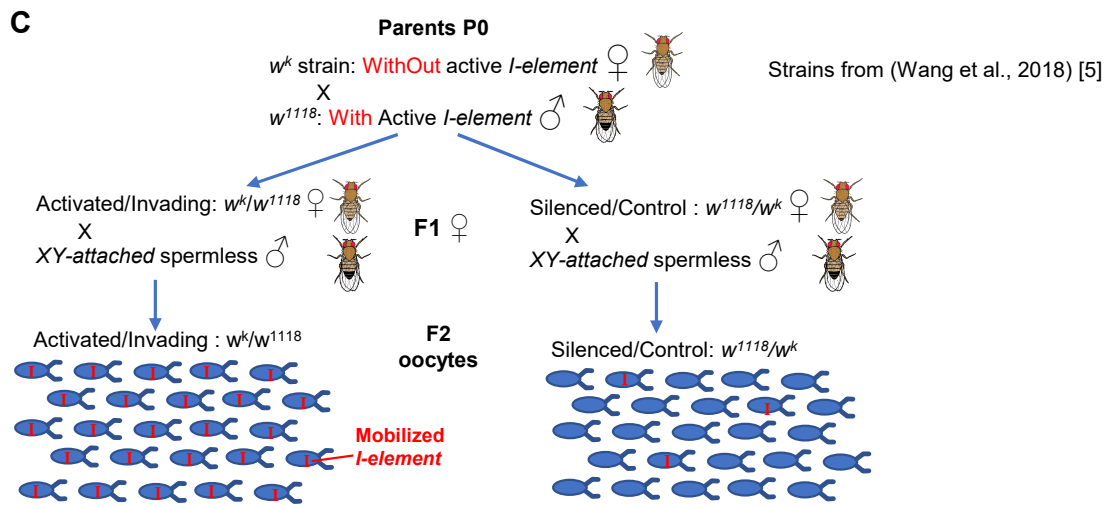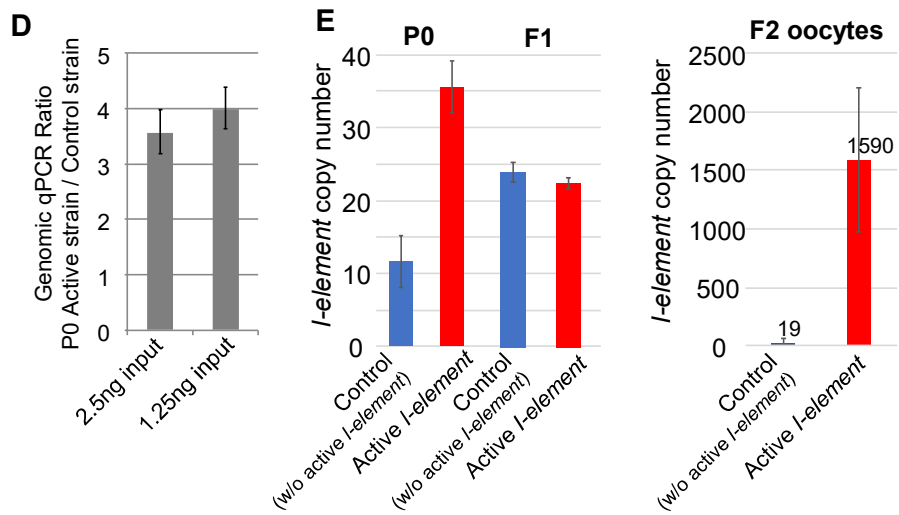

Supplement: pgen.1010024.s005.pdf [file pgen.1010024.s005.pdf]
