# Supplementary material for: Transposable element landscapes in aging Drosophila
Source: PubMed Central journal article supplement (PMC8893327; doi:10.1371/journal.pgen.1010024), 2022-03-03
Supplement: pgen.1010024.s009.pdf [file pgen.1010024.s009.pdf]

S1 Table. Statistics of the rounds of whole genome sequencing (WGS) using TIDALv1.2

| Updated Sample Name              | Library Size | Percent Reads Not mapped to Genome | Percent immobile gene element (IGE) | Mapped reads before downsampling | Sample Name for downstampling       | Fraction number used for downsampling by Seqtk | Library Size | Percent Reads Not mapped to Genome | Percent Mapped reads after downsampling | Sample Name for downstampling | Absolute value of mapped reads difference between 5d and 30d | Insertion Total | Insertion CR=1 | Insertion CR<=1 | Insertion CR>2 | Insertion CR=2 | Insertion Total (RPM) | Insertion CR>1 (RPM) | Insertion CR=1 (RPM) | Insertion CR>2 (RPM) | Insertion CR<=2 (RPM) | No. TE families represented | TE Insertions norm by TE families | Inputed into Graphpad Prism |
|----------------------------------|--------------|------------------------------------|-------------------------------------|----------------------------------|-------------------------------------|------------------------------------------------|--------------|------------------------------------|-----------------------------------------|-------------------------------|--------------------------------------------------------------|-----------------|----------------|-----------------|----------------|----------------|-----------------------|----------------------|----------------------|----------------------|-----------------------|-----------------------------|-----------------------------------|-----------------------------|
| ISO1_5d                          | 42,390,086   | 6%                                 | 6%                                  | 39,766,140                       | ISO1_5d_ds                          | 0.8252                                         | 34,981,554   | 6%                                 | 32,814,237                              |                               | 40                                                           | 34              | 6              | 23              | 17             | 122            | 1.04                  | 0.18                 | 0.70                 | 0.52                 | 11                    | 3.64                        | Young Old                         |                             |
| ISO1_30d                         | 35,167,146   | 7%                                 | 9%                                  | 32,816,328                       | ISO1_30d                            |                                                | 35,167,146   | 7%                                 | 32,816,328                              | 2,091                         | 40                                                           | 36              | 4              | 22              | 18             | 122            | 1.10                  | 0.12                 | 0.67                 | 0.55                 | 9                     | 4.44                        | Iso1-whole 3.64 4.44              |                             |
| OreR_5d                          | 36,965,737   | 7%                                 | 8%                                  | 34,429,887                       | OreR_5d                             |                                                | 36,965,737   | 7%                                 | 34,429,887                              |                               | 698                                                          | 583             | 115            | 374             | 324            | 20.27          | 16.93                 | 3.34                 | 10.86                | 9.41                 | 58                    | 12.03                       | OreR-brain 12.03 13.82            |                             |
| OreR_30d                         | 46,368,182   | 10%                                | 6%                                  | 41,768,458                       | OreR_30d_ds                         | 0.8243                                         | 38,220,319   | 10%                                | 34,428,940                              | 948                           | 705                                                          | 621             | 84             | 382             | 323            | 20.48          | 18.04                 | 2.44                 | 11.10                | 9.38                 | 51                    | 13.82                       | W1118-whole 10.40 10.17           |                             |
| w1118_5d                         | 34,585,247   | 6%                                 | 7.7%                                | 32,506,674                       | w1118_5d                            |                                                | 34,585,247   | 6%                                 | 32,506,674                              |                               | 541                                                          | 483             | 58             | 301             | 240            | 16.64          | 14.86                 | 1.78                 | 9.26                 | 7.38                 | 52                    | 10.40                       |                                   |                             |
| w1118_30d                        | 35,937,251   | 7%                                 | 7%                                  | 33,551,018                       | w1118_30d_ds                        | 0.9689                                         | 34,818,375   | 7%                                 | 32,505,425                              | 1,248                         | 529                                                          | 467             | 62             | 285             | 244            | 16.27          | 14.37                 | 1.91                 | 8.77                 | 7.51                 | 52                    | 10.17                       | Young Old                         |                             |
| ISO1_5d_brain                    | 34,831,057   | 16%                                | 5%                                  | 29,557,635                       | ISO1_5d_brain                       |                                                | 34,831,057   | 15%                                | 29,557,635                              |                               | 36                                                           | 34              | 2              | 23              | 13             | 1.22           | 1.15                  | 0.07                 | 0.78                 | 0.44                 | 9                     | 4.00                        | Iso1-brain 4.00 3.30              |                             |
| ISO1_30d_brain                   | 42,955,475   | 26%                                | 40%                                 | 31,920,213                       | ISO1_30d_brain_ds                   | 0.9260                                         | 39,776,599   | 26%                                | 29,562,923                              | 5,288                         | 33                                                           | 30              | 3              | 22              | 11             | 1.12           | 1.01                  | 0.10                 | 0.74                 | 0.37                 | 10                    | 3.30                        | OreR-brain 11.81 11.51            |                             |
| OreR_5d_brain                    | 44,960,787   | 15%                                | 6%                                  | 38,081,787                       | OreR_5d_brain                       | 0.9353                                         | 42,049,780   | 15%                                | 35,617,425                              |                               | 638                                                          | 546             | 92             | 323             | 315            | 17.91          | 15.33                 | 2.58                 | 9.07                 | 8.84                 | 54                    | 11.81                       | W1118-brain 8.56 8.16             |                             |
| OreR_30d_brain                   | 41,578,756   | 14%                                | 4%                                  | 35,616,362                       | OreR_30d_brain                      |                                                | 41,578,756   | 14%                                | 35,616,362                              | 1,063                         | 679                                                          | 601             | 78             | 380             | 299            | 19.06          | 16.87                 | 2.19                 | 10.67                | 8.40                 | 59                    | 11.51                       |                                   |                             |
| w1118_5d_brain                   | 42,288,946   | 15%                                | 6%                                  | 36,030,182                       | w1118_5d_brain_ds                   | 0.7940                                         | 33,575,505   | 15%                                | 28,609,117                              |                               | 428                                                          | 382             | 46             | 192             | 236            | 14.96          | 13.35                 | 1.61                 | 6.71                 | 8.25                 | 50                    | 8.56                        |                                   |                             |
| w1118_30d_brain                  | 38,979,690   | 27%                                | 7%                                  | 28,607,194                       | w1118_30d_brain                     |                                                | 38,979,690   | 27%                                | 28,607,194                              | 1,923                         | 400                                                          | 373             | 27             | 214             | 186            | 13.98          | 13.04                 | 0.94                 | 7.48                 | 6.50                 | 49                    | 8.16                        | Young Old                         |                             |
| piwi_g1_5d                       | 82,195,374   | 9%                                 | 22%                                 | 74,542,738                       | piwi_g1_5d_ds                       | 0.8259                                         | 67,888,982   | 9%                                 | 61,567,703                              |                               | 566                                                          | 492             | 74             | 342             | 224            | 9.19           | 7.99                  | 1.20                 | 5.55                 | 3.64                 | 62                    | 9.13                        | piwi-g1-whole 9.13 9.10           |                             |
| piwi_g1_30d                      | 70,142,704   | 12%                                | 17%                                 | 61,566,636                       | piwi_g1_30d                         |                                                | 70,142,704   | 12%                                | 61,566,636                              | 1,067                         | 573                                                          | 501             | 72             | 359             | 214            | 9.31           | 8.14                  | 1.17                 | 5.83                 | 3.48                 | 63                    | 9.10                        | piwi-HDR-whole 9.69 10.38         |                             |
| Piwi(HDR-4xP3-mCherry)_5d        | 68,138,461   | 25%                                | 13%                                 | 51,076,590                       | Piwi(HDR-4xP3-mCherry)_5d_ds        | 0.7284                                         | 49,630,544   | 25%                                | 37,208,763                              |                               | 572                                                          | 508             | 64             | 321             | 251            | 15.37          | 13.65                 | 1.72                 | 8.63                 | 6.75                 | 59                    | 9.69                        | ago2-5-14-whole 9.10 8.67         |                             |
| Piwi(HDR-4xP3-mCherry)_30d       | 52,287,196   | 29%                                | 8%                                  | 37,202,340                       | Piwi(HDR-4xP3-mCherry)_30d          |                                                | 52,287,196   | 29%                                | 37,202,340                              | 6,423                         | 623                                                          | 527             | 96             | 330             | 293            | 16.75          | 14.17                 | 2.58                 | 8.87                 | 7.88                 | 60                    | 10.38                       | ago2-16-4-whole 9.52 11.18        |                             |
| piwi_g1_5d_brain                 | 38,963,764   | 16%                                | 20%                                 | 32,842,557                       | piwi_g1_5d_brain                    | 0.9699                                         | 37,791,268   | 16%                                | 31,852,748                              |                               | 525                                                          | 485             | 40             | 358             | 167            | 16.48          | 15.23                 | 1.26                 | 11.24                | 5.24                 | 56                    | 9.38                        | sub-g1-whole 6.45 9.97            |                             |
| piwi_g1_30d_brain                | 35,579,471   | 10%                                | 7%                                  | 31,854,300                       | piwi_g1_30d_brain                   |                                                | 35,579,471   | 10%                                | 31,854,300                              | 1,552                         | 513                                                          | 474             | 39             | 331             | 182            | 16.10          | 14.88                 | 1.22                 | 10.39                | 5.71                 | 56                    | 9.16                        | sub-g2-whole 5.22 9.16            |                             |
| Piwi(HDR-4xP3-mCherry)_5d_brain  | 35,924,059   | 15%                                | 11%                                 | 30,639,630                       | Piwi(HDR-4xP3-mCherry)_5d_brain     |                                                | 35,924,059   | 15%                                | 30,639,630                              |                               | 565                                                          | 509             | 56             | 333             | 232            | 18.44          | 16.61                 | 1.83                 | 10.87                | 7.57                 | 56                    | 10.09                       | ago3-g1-whole 10.19 8.86          |                             |
| Piwi(HDR-4xP3-mCherry)_30d_brain | 39,666,916   | 16%                                | 28%                                 | 33,264,676                       | Piwi(HDR-4xP3-mCherry)_30d_brain_ds | 0.9211                                         | 36,536,806   | 16%                                | 30,642,213                              | 2,584                         | 620                                                          | 545             | 75             | 369             | 251            | 20.23          | 17.79                 | 2.45                 | 12.04                | 8.19                 | 59                    | 10.51                       | ago3-g2-whole 6.47 9.89           |                             |
| Ago2_2-5-14_5d                   | 44,463,804   | 15%                                | 9%                                  | 37,625,271                       | Ago2_2-5-14_5d_ds                   | 0.9024                                         | 40,126,482   | 15%                                | 33,955,430                              |                               | 537                                                          | 486             | 51             | 308             | 229            | 15.81          | 14.31                 | 1.50                 | 9.07                 | 6.74                 | 59                    | 9.10                        | Young Old                         |                             |
| Ago2_2-5-14_30d                  | 40,686,426   | 17%                                | 9%                                  | 33,952,822                       | Ago2_2-5-14_30d                     |                                                | 40,686,426   | 17%                                | 33,952,822                              | 2,608                         | 555                                                          | 496             | 59             | 322             | 233            | 16.35          | 14.61                 | 1.74                 | 9.48                 | 6.86                 | 64                    | 8.67                        | piwi-g1-brain 9.38 9.16           |                             |
| Ago2_2-16-4_5d                   | 61,396,191   | 16%                                | 4%                                  | 51,732,431                       | Ago2_2-16-4_5d                      |                                                | 61,396,191   | 16%                                | 51,732,431                              |                               | 619                                                          | 459             | 160            | 261             | 358            | 11.97          | 8.87                  | 3.09                 | 5.05                 | 6.92                 | 65                    | 9.52                        | piwi-HDR-brain 10.09 10.51        |                             |
| Ago2_2-16-4_30d                  | 62,081,936   | 9%                                 | 14%                                 | 56,185,394                       | Ago2_2-16-4_30d_ds                  | 0.9207                                         | 57,162,528   | 9%                                 | 51,732,431                              | 57                            | 749                                                          | 529             | 220            | 298             | 451            | 14.48          | 10.23                 | 4.25                 | 5.76                 | 8.72                 | 67                    | 11.18                       | ago2-5-14-brain 8.79 8.57         |                             |
| Ago2 Rescue 2-5-14_5d            | 44,465,825   | 22%                                | 5%                                  | 34,623,003                       | Ago2 Rescue 2-5-14_5d               |                                                | 44,465,825   | 22%                                | 34,623,003                              |                               | 242                                                          | 233             | 9              | 153             | 89             | 6.99           | 6.73                  | 0.26                 | 4.42                 | 2.57                 | 47                    | 5.15                        | ago2-16-4-brain 9.53 9.00         |                             |
| Ago2 Rescue 2-5-14_30d           | 56,700,302   | 17%                                | 5%                                  | 47,271,042                       | Ago2 Rescue 2-5-14_30d_ds           | 0.7324                                         | 41,530,738   | 17%                                | 34,629,783                              | 6,780                         | 383                                                          | 336             | 47             | 168             | 215            | 11.06          | 9.70                  | 1.36                 | 4.85                 | 6.21                 | 51                    | 7.51                        |                                   |                             |
| Ago2_2-5-14_5d_brain             | 41,131,381   | 6%                                 | 8%                                  | 38,470,181                       | Ago2_2-5-14_5d_brain_ds             | 0.8218                                         | 33,801,611   | 6%                                 | 31,616,235                              |                               | 501                                                          | 442             | 59             | 289             | 212            | 15.85          | 13.98                 | 1.87                 | 9.14                 | 6.71                 | 57                    | 8.79                        |                                   |                             |
| Ago2_2-5-14_30d_brain            | 34,741,442   | 9%                                 | 5%                                  | 31,614,712                       | Ago2_2-5-14_30d_brain               |                                                | 34,741,442   | 9%                                 | 31,614,712                              | 1,523                         | 540                                                          | 485             | 55             | 290             | 250            | 17.08          | 15.34                 | 1.74                 | 9.17                 | 7.91                 | 63                    | 8.57                        |                                   |                             |
| Ago2_2-16-4_5d_brain             | 33,172,807   | 18%                                | 23%                                 | 27,042,472                       | Ago2_2-16-4_5d_brain                |                                                | 33,172,807   | 18%                                | 27,042,472                              |                               | 505                                                          | 440             | 65             | 240             | 265            | 18.67          | 16.27                 | 2.40                 | 8.87                 | 9.80                 | 53                    | 9.53                        |                                   |                             |
| Ago2_2-16-4_30d_brain            | 37,993,116   | 15%                                | 10%                                 | 32,377,733                       | Ago2_2-16-4_30d_brain_ds            | 0.8352                                         | 31,732,611   | 15%                                | 27,041,928                              | 544                           | 531                                                          | 473             | 58             | 275             | 256            | 19.64          | 17.49                 | 2.14                 | 10.17                | 9.47                 | 59                    | 9.00                        |                                   |                             |
| dcr2_L811fsx_5d                  | 51,904,680   | 14%                                | 9%                                  | 44,440,787                       | dcr2_L811fsx_5d                     |                                                | 51,904,680   | 14%                                | 44,440,787                              |                               | 713                                                          | 527             | 186            | 271             | 442            | 16.04          | 11.86                 | 4.19                 | 6.10                 | 9.95                 | 67                    | 10.64                       |                                   |                             |
| dcr2_L811fsx_30d                 | 64,574,190   | 9%                                 | 12%                                 | 58,562,333                       | dcr2_L811fsx_30d_ds                 | 0.7589                                         | 49,002,795   | 9%                                 | 44,440,978                              | 191                           | 676                                                          | 495             | 181            | 297             | 379            | 15.21          | 11.14                 | 4.07                 | 6.68                 | 8.53                 | 66                    | 10.24                       |                                   |                             |
| dcr2_R416X_5d                    | 73,294,098   | 10%                                | 12%                                 | 65,642,194                       | dcr2_R416X_5d                       | 0.7705                                         | 56,473,416   | 10%                                | 50,577,704                              |                               | 677                                                          | 533             | 144            | 321             | 356            | 13.39          | 10.54                 | 2.85                 | 6.35                 | 7.04                 | 67                    | 10.10                       |                                   |                             |
| dcr2_R416X_30d                   | 60,048,253   | 16%                                | 12%                                 | 50,578,644                       | dcr2_R416X_30d                      |                                                | 60,048,253   | 16%                                | 50,578,644                              | 939                           | 631                                                          | 504             | 127            | 299             | 332            | 12.48          | 9.96                  | 2.51                 | 5.91                 | 6.56                 | 62                    | 10.18                       |                                   |                             |
| dcr2_L811fsx_5d_brain            | 42,466,420   | 32%                                | 19%                                 | 28,809,219                       | dcr2_L811fsx_5d_brain               |                                                | 42,466,420   | 32%                                | 28,809,219                              |                               | 630                                                          | 525             | 105            | 322             | 308            | 21.87          | 18.22                 | 3.64                 | 11.18                | 10.69                | 64                    | 9.84                        |                                   |                             |
| dcr2_L811fsx_30d_brain           | 42,943,415   | 14%                                | 33%                                 | 37,017,224                       | dcr2_L811fsx_30d_brain_ds           | 0.7783                                         | 33,420,377   | 14%                                | 28,807,296                              | 1,924                         | 528                                                          | 459             | 69             | 283             | 245            | 18.33          | 15.93                 | 2.40                 | 9.82                 | 8.50                 | 60                    | 8.80                        |                                   |                             |
| dcr2_R416X_5d_brain              | 36,338,010   | 9%                                 | 13%                                 | 33,005,814                       | dcr2_R416X_5d_brain_ds              | 0.8479                                         | 30,813,726   | 9%                                 | 27,988,415                              |                               | 545                                                          | 487             | 58             | 294             | 251            | 19.47          | 17.40                 | 2.07                 | 10.50                | 8.97                 | 58                    | 9.40                        |                                   |                             |
| dcr2_R416X_30d_brain             | 34,659,112   | 19%                                | 16%                                 | 27,987,233                       | dcr2_R416X_30d_brain                |                                                | 34,659,112   | 19%                                | 27,987,233                              | 1,183                         | 581                                                          | 498             | 83             | 303             | 278            | 20.76          | 17.79                 | 2.97                 | 10.83                | 9.93                 | 59                    | 9.85                        |                                   |                             |
| aub_g1_5d                        | 176,183,413  | 28%                                | 12%                                 | 126,177,980                      | aub_g1_5d_ds                        | 0.5368                                         | 94,577,520   | 28%                                | 67,720,815                              |                               | 213                                                          | 211             | 2              | 150             | 63             | 3.15           | 3.12                  | 0.03                 | 2.21                 | 0.93                 | 33                    | 6.45                        |                                   |                             |
| aub_g1_30d                       | 83,384,716   | 19%                                | 16%                                 | 67,727,818                       | aub_g1_30d                          |                                                | 83,384,716   | 19%                                | 67,727,818                              | 7,003                         | 628                                                          | 508             | 120            | 339             | 289            | 9.27           | 7.50                  | 1.77                 | 5.01                 | 4.27                 | 63                    | 9.97                        |                                   |                             |
| aub_g2_5d                        | 132,178,268  | 28%                                | 13%                                 | 94,632,767                       | aub_g2_5d_ds                        | 0.5280                                         | 69,796,945   | 28%                                | 49,970,844                              |                               | 188                                                          | 180             | 8              | 122             | 66             | 3.76           | 3.60                  | 0.16                 | 2.44                 | 1.32                 | 36                    | 5.22                        |                                   |                             |
| aub_g2_30d                       | 56,359,204   | 11%                                | 12%                                 | 49,964,463                       | aub_g2_30d                          |                                                | 56,359,204   | 11%                                | 49,964,463                              | 6,380                         | 568                                                          | 481             | 87             | 328             | 240            | 11.37          | 9.63                  | 1.74                 | 6.56                 | 4.80                 | 62                    | 9.16                        |                                   |                             |
| ago3_g1_5d                       | 41,944,350   | 9%                                 | 10%                                 | 38,043,735                       | ago3_g1_5d                          |                                                | 41,944,350   | 9%                                 | 38,043,735                              |                               | 581                                                          | 459             | 122            | 284             | 297            | 15.27          | 12.07                 | 3.21                 | 7.47                 | 7.81                 | 57                    | 10.19                       |                                   |                             |
| ago3_g1_30d                      | 55,667,008   | 18%                                | 13%                                 | 45,880,748                       | ago3_g1_30d_ds                      | 0.8292                                         | 46,159,249   | 18%                                | 38,042,653                              | 1,082                         | 523                                                          | 407             | 116            | 222             | 301            | 13.75          | 10.70                 | 3.05                 | 5.84                 | 7.91                 | 59                    | 8.86                        |                                   |                             |
| ago3_g2_5d                       | 104,440,858  | 26%                                | 10%                                 | 77,269,629                       | ago3_g2_5d_ds                       | 0.7057                                         | 73           |                                    |                                         |                               |                                                              |                 |                |                 |                |                |                       |                      |                      |                      |                       |                             |                                   |                             |
