# Supplementary material for: Transposable element landscapes in aging Drosophila
Source: PubMed Central journal article supplement (PMC8893327; doi:10.1371/journal.pgen.1010024), 2022-03-03
Supplement: pgen.1010024.s010.pdf [file pgen.1010024.s010.pdf]

**S2 Table. Oligonucleotide primers used in this study**

|             |                            |
|-------------|----------------------------|
| gypsy_F     | CCAGGTCGGGCTGTTATAGG       |
| gypsy_R     | GAACCGGTGTA CTCAAGAGC      |
| 297_F       | AAAGGGCGCTCATACAAATG       |
| 297_R       | TGTGCACATAAAATGGTTCG       |
| roo_F       | CGTCTGCAATGTA CTGGCTCT     |
| roo_R       | CGGCACTCCACTA ACTTCTCC     |
| l-element_F | TGAAATACGGCATA CTGCCCCA    |
| l-element_R | GCTGATAGGGAGT CGGAGCAGATA  |
| mdg1_F      | CACATGTTCTCA TTCCCAACC     |
| mdg1_R      | TTCGCTTTTTAT ATTTGCGCTAC   |
| hobo-F      | ACTCACACCCTACA ATTTTGTGTG  |
| hobo-R      | GTGTTTAACGGTATA CCCACAAGTG |
| jockey_F    | TGCAGTTGTTCC CCTAACC       |
| jockey_R    | AGTTGGGCAAATG CTAGTGG      |
| blood_F     | TGCCACAGTACCTG ATTTTCG     |
| blood_R     | GATTCGCCTTTTACG TTTTGC     |
| 412_F       | CACCGGTTTGGT CGAAAG        |
| 412_R       | GGACATGCCTGGT ATTTTGG      |
| P-element-F | TTAATATTAGCAG CGCGAAACGTC  |
| P-element-R | GTTGATTAACCCT TAGCATGTCCG  |
| diver_F     | TTTTTGGAGCCGAC CTTATG      |
| diver_R     | GGCGTGTAATATG CGGTGTTG     |
| Het-A_F     | CGCGCGGAACCCAT CTTCAGA     |
| Het-A_R     | CGCCGCAGTCGTT TGGTGAGT     |
| S-element_F | TGAAAAGCGTCA TTCAATTCG     |
| S-element_R | TGTTTCTAGCGCA CTCAACG      |
| 17.31_F     | AGCAAACGTCTGT TGGGAAGG     |
| 17.31_R     | CGACAGCAAACAAC ACTGC       |
| NoF_F       | AGTTGGACCTGGA ATTGTGG      |
| NoF_R       | AATGCACACGGAAG AGGAAC      |
| Idefix_F    | AACAAAATCGTGGC AGGAAG      |
| Idefix_R    | TCCATTTTTCGCG TTTACTG      |
| TAHRE_F     | CTGTTGCACAAAG CCAAGAA      |
| TAHRE_R     | GTTGGTAATGTT CGCGTCCT      |
| burdock_F   | CGGTAAAATCGCT TCATGGT      |
| burdock_R   | ACGTTGCATTTCC CTGTTTC      |
| MT_ND5_F    | GCAGAAACAGGTGT AGGAGCA     |
| MT_ND5_R    | TCGAATTGGGGAT GTAGCTT      |
| Copia-F1    | ATTTCTTCTCAGA ATTTGAGTG    |
| Copia-R1    | AGAATCTGACGCG CCGTAATGTC   |
| Copia-P1    | GTCGTGGTGTGTT GTTGCAGTTG   |
| Copia-P2    | GAATAAAAAGAGT GGTATTCTCT   |
| Copia_P8    | AGGTGTGGCCATT CATATCAAATA  |

|                   |                           |
|-------------------|---------------------------|
| Copia_P9          | GTGCTGGTGTTCAGTTGAA       |
| Copia_P10         | TGTGAGTAGGTCGTGGTGCTGGTGT |
| Copia_P11         | TTCTCTTACAATATGTTTTATGGCA |
| Rp49-F            | ATGACCATCCGCCAGCATAAC     |
| Rp49-R            | CTGCATGAGCAGGACCTCCAG     |
| TFIIs-F           | GGATTGCGAGGCAACTTTATG     |
| TFIIs-R           | CAGCTGGGCATCGTTGATG       |
| Paf1-F            | CATCTACTACAACGAGCTAG      |
| Paf1-R            | ACGATGCTCCATGCTGTCC       |
| Ago2-F            | GTGGTTTACACGCCTCCTCA      |
| Ago2-R            | GGTAGTTGCGACTGTGGAA       |
| PIWI-F            | TCGTACCCAATGATAACGCCGAAAG |
| PIWI-R            | AGTCCGGACAAGGGTAGTTCGATCA |
| M13-F             | GTAAAACGACGGCCAG          |
| M13-R             | CAGGAAACAGCTATGAC         |
| pGL3-ScreenFW     | CCTCTTCGCTATTACGCCAG      |
| piwiPro-ScreenRV1 | AAAATTTCAATCGTTGCAAGAG    |
| Cas9-qPCR-F       | CCTATCTGACATACTGAGAG      |
| Cas9-qPCR-R       | CTGACGGACTAGGGCCTTG       |
