# Supplementary material for: Transposable element landscapes in aging Drosophila
Source: PubMed Central journal article supplement (PMC8893327; doi:10.1371/journal.pgen.1010024), 2022-03-03
Supplement: pgen.1010024.s011.pdf [file pgen.1010024.s011.pdf]

**S3 Table. Statistics for the eccDNA sequencing.**

| Sample                 | round of sequencing | total reads | non-genome | % mapped | total normalized TE RPM | total RPM of gene locus | total RPM of 100 IGE coverage |
|------------------------|---------------------|-------------|------------|----------|-------------------------|-------------------------|-------------------------------|
| ISO1_5d_eccDNA         | 10                  | 80,124,184  | 14,126,324 | 82%      | 80,851                  | 850,665                 | 5,549                         |
| ISO1_30d_eccDNA        | 10                  | 93,863,638  | 14,549,473 | 84%      | 65,239                  | 1,046,201               | 3,991                         |
| OreR_5d_eccDNA         | 10                  | 171,868,561 | 32,774,330 | 81%      | 58,725                  | 517,767                 | 6,178                         |
| OreR_30d_eccDNA        | 10                  | 49,304,055  | 11,129,812 | 77%      | 65,780                  | 636,615                 | 4,476                         |
| w1118_5d_eccDNA        | 10                  | 14,651,052  | 3,360,328  | 77%      | 81,093                  | 685,749                 | 6,339                         |
| w1118_30d_eccDNA       | 10                  | 11,695,633  | 2,674,768  | 77%      | 83,355                  | 651,368                 | 7,614                         |
| w1118_5d_brain_eccDNA  | 10                  | 13,515,783  | 7,702,952  | 43%      | 72,287                  | 605,134                 | 95,893                        |
| w1118_30d_brain_eccDNA | 10                  | 53,426,975  | 14,022,417 | 74%      | 52,315                  | 472,422                 | 92,631                        |
| OreR_5d_brain_eccDNA   | 10                  | 15,769,719  | 4,277,015  | 73%      | 76,976                  | 273,822                 | 104,351                       |
| OreR_30d_brain_eccDNA  | 10                  | 47,331,779  | 12,152,812 | 74%      | 45,203                  | 380,664                 | 109,388                       |

| Sample                 | round of sequencing | MT@chrM   | Plasmid@GFP | Plasmid@pCNEPm3_6336bp | Plasmid@pG L3-DmPiwipro1 | Plasmid@pGS HO_5227bps | Plasmid@pJC9 F3 | Plasmid@pM AXGFP | Plasmid@pUC19 |
|------------------------|---------------------|-----------|-------------|------------------------|--------------------------|------------------------|-----------------|------------------|---------------|
| ISO1_5d_eccDNA         | 10                  | 470,293   | 713         | 12,086                 | 365,543                  | 45,981                 | 47,612          | 31,858           | 31,823        |
| ISO1_30d_eccDNA        | 10                  | 395,508   | 313         | 3,025                  | 81,102                   | 10,176                 | 10,517          | 7,022            | 7,685         |
| OreR_5d_eccDNA         | 10                  | 191,913   | 920         | 14,060                 | 433,461                  | 53,438                 | 56,777          | 36,779           | 37,651        |
| OreR_30d_eccDNA        | 10                  | 210,051   | 272         | 3,017                  | 90,584                   | 11,190                 | 8,602           | 7,787            | 7,967         |
| w1118_5d_eccDNA        | 10                  | 1,425,500 | 375         | 2,371                  | 52,165                   | 7,155                  | 6,253           | 5,350            | 5,722         |
| w1118_30d_eccDNA       | 10                  | 101,033   | 173         | 1,977                  | 59,690                   | 7,483                  | 6,669           | 5,077            | 5,355         |
| w1118_5d_brain_eccDNA  | 10                  | 771,359   | 3,962       | 21,663                 | 425,469                  | 61,182                 | 46,826          | 47,247           | 49,203        |
| w1118_30d_brain_eccDNA | 10                  | 3,451,600 | 2,766       | 31,852                 | 857,022                  | 111,724                | 81,784          | 77,375           | 81,784        |
| OreR_5d_brain_eccDNA   | 10                  | 841,007   | 3,144       | 17,386                 | 361,569                  | 49,613                 | 37,647          | 37,759           | 39,766        |
| OreR_30d_brain_eccDNA  | 10                  | 2,852,930 | 1,517       | 17,308                 | 498,556                  | 61,312                 | 44,585          | 42,908           | 44,359        |

| Sample                 | round of sequencing | R1 Total Reads | R1 Trimmed Reads | R1 Percent | R2 Total Reads | R2 Trimmed Reads | R2 Percent | Total reads after trimming |
|------------------------|---------------------|----------------|------------------|------------|----------------|------------------|------------|----------------------------|
| ISO1_5d_eccDNA         | 10                  | 43,314,374     | 4,941,273        | 11.40%     | 43,314,374     | 3,429,599        | 7.90%      | 78,257,876                 |
| ISO1_30d_eccDNA        | 10                  | 49,299,813     | 3,557,839        | 7.20%      | 49,299,813     | 2,281,603        | 4.60%      | 92,760,184                 |
| OreR_5d_eccDNA         | 10                  | 90,513,410     | 11,323,026       | 12.50%     | 90,513,410     | 11,958,631       | 13.20%     | 157,745,163                |
| OreR_30d_eccDNA        | 10                  | 27,517,013     | 3,828,369        | 13.90%     | 27,517,013     | 2,167,137        | 7.90%      | 49,038,520                 |
| w1118_5d_eccDNA        | 10                  | 9,888,427      | 3,136,663        | 31.70%     | 9,888,427      | 754,235          | 7.60%      | 15,885,956                 |
| w1118_30d_eccDNA       | 10                  | 7,945,211      | 2,600,857        | 32.70%     | 7,945,211      | 815,937          | 10.30%     | 12,473,628                 |
| w1118_5d_brain_eccDNA  | 10                  | 12,740,321     | 6,516,238        | 51.10%     | 12,740,321     | 641,323          | 5.00%      | 18,323,081                 |
| w1118_30d_brain_eccDNA | 10                  | 30,474,488     | 4,559,702        | 15.00%     | 30,474,488     | 2,521,704        | 8.30%      | 53,867,570                 |
| OreR_5d_brain_eccDNA   | 10                  | 11,768,752     | 4,342,637        | 36.90%     | 11,768,752     | 463,058          | 3.90%      | 18,731,809                 |
| OreR_30d_brain_eccDNA  | 10                  | 24,416,927     | 1,018,864        | 4.20%      | 24,416,927     | 1,677,687        | 6.90%      | 46,137,303                 |
